# Supplementary material for: Solid–liquid equilibria in systems [Cxmim][Tf2N] with diethylamine
Source: publisher site journal article supplement (doi:10.1515/pac-2014-1119), 2015-03-07
Supplement: Supplementary file 1 [file pac-2014-1119_info.docx]

**Table 1-SI**: Data used for the calculations: enthalpies of fusion Δfus*H* (eq. 1-3)*,* constants of heat capacities in eq. 1 (Δfus*a*=*a*liq-*a* sol*,* Δfus*b*=*b*liq-*b*sol*,* Δfus*c*=*c*liq-*c*sol), errors of determination of mole fraction, temperature, enthalpy of fusion in eq. 4 (*sx, sT, sH*).

|  | Δfus*H* [J·mol-1] | *a*liq  [J·K-1·mol-1] | *a*sol  [J·K-1·mol-1] | Δfus*a*  [J·K-1·mol-1] | *b*liq  [J·K-2·mol-1] | *b*sol  [J·K-2·mol-1] | Δfus*b*  [J·K-2·mol-1] | *c*liq  [J·K-3·mol-1] | *c*sol  [J·K-3·mol-1] | Δfus*c*  [J·K-3·mol-1] |
| --- | --- | --- | --- | --- | --- | --- | --- | --- | --- | --- |
| [bmim][Tf2N] [25] | 23780 | 467.25 | 167.95 | 299.33 | 12.99·10-2 | 71.93·10-2 | -58.94·10-2 | 6.65·10-4 | 13.01·10-4 | 6.36·10-4 |
| [emim][Tf2N] [24] | 21890 | 363.19 | 87.37 | 275.82 | 0.47 | 1.17 | -0.7 |  |  |  |
| dietyhlamine | 13300 |  |  |  |  |  |  |  |  |  |
|  | *sx* | *sT*  [K] | *sH*  [J·mol-1] |  |  |  |  |  |  |  |
| [bmim][Tf2N] | 0.0005 | 0.15 | 40 |  |  |  |  |  |  |  |
| [emim][Tf2N] | 0.0005 | 0.15 | 30 |  |  |  |  |  |  |  |

**Table 2-SI:** System diethylamine (1) + [emim][Tf2N] (2) – solid-liquid equilibrium data

|  |  |  |  | | **equation 1** | | | | | |  |  | | **equation 2** | | | | | |  |
| --- | --- | --- | --- | --- | --- | --- | --- | --- | --- | --- | --- | --- | --- | --- | --- | --- | --- | --- | --- | --- |
| ***x*1** | ***T*fus [K]** | **γ1**  (eq.2) | γ2  (eq.1) | 103 σ(ln γ)  (eq.4) | | σ*x*  (eq. 5) | | 102 σ*T*  (eq. 5) | | σ*H*  (eq. 5) | | γ2  (eq.2) | 103 σ(ln γ) (eq.4) | | | σ*x*  (eq. 5) | 102 σ*T*  (eq. 5) | | σ*H*  (eq. 5) | |
| 1.0000 | 224.73 | 1.0000 |  | |  | |  | |  | |  |  | |  |  | | |  | |  |
| 0.9982 | 224.57 | 0.9967 |  |  | |  | |  | |  | |  |  | | |  |  | |  | |
| 0.9961 | 225.42 |  |  |  | |  | |  | |  | |  |  | | |  |  | |  | |
| 0.9918 | 233.38 |  |  |  | |  | |  | |  | |  |  | | |  |  | |  | |
| 0.9581 | 233.56 |  |  |  | |  | |  | |  | |  |  | | |  |  | |  | |
| 0.9405 | 233.65 |  |  |  | |  | |  | |  | |  |  | | |  |  | |  | |
| 0.9160 | 233.81 |  |  |  | |  | |  | |  | |  |  | | |  |  | |  | |
| 0.9000 | 233.82 |  |  |  | |  | |  | |  | |  |  | | |  |  | |  | |
| 0.8008 | 233.83 |  |  |  | |  | |  | |  | |  |  | | |  |  | |  | |
| 0.7013 | 233.97 |  | 1.2850 | 6.78 | | -3.35 | | 4.28 | | -4.63·10-5 | | 1.2150 | 7.54 | | | -3.35 | 4.81 | | -4.63·10-5 | |
| 0.5999 | 239.76 |  | 1.2267 | 6.52 | | -2.50 | | 4.21 | | -3.39·10-5 | | 1.1903 | 7.06 | | | -2.50 | 4.58 | | -3.39·10-5 | |
| 0.4996 | 244.85 |  | 1.2132 | 6.34 | | -2.00 | | 4.15 | | -2.35·10-5 | | 1.1958 | 6.70 | | | -2.00 | 4.39 | | -2.35·10-5 | |
| 0.4043 | 247.74 |  | 1.1482 | 6.24 | | -1.68 | | 4.11 | | -1.77·10-5 | | 1.1387 | 6.51 | | | -1.68 | 4.29 | | -1.77·10-5 | |
| 0.3015 | 251.59 |  | 1.1458 | 6.13 | | -1.43 | | 4.05 | | -1.03·10-5 | | 1.1426 | 6.29 | | | -1.43 | 4.16 | | -1.03·10-5 | |
| 0.2027 | 254.66 |  | 1.1363 | 6.06 | | -1.25 | | 4.02 | | -4.54·10-6 | | 1.1357 | 6.12 | | | -1.25 | 4.06 | | -4.54·10-6 | |
| 0.0921 | 257.10 |  | 1.1001 | 6.00 | | -1.10 | | 3.98 | | -5.46·10-8 | | 1.1001 | 6.00 | | | -1.10 | 3.98 | | -5.46·10-8 | |
| 0.0000 | 257.13 |  | 1.0000 | 5.99 | | -1.00 | | 3.98 | | 0.00 | | 1.0000 | 5.99 | | | -1.00 | 3.98 | | 0.00 | |

**Table 3-SI**: System diethylamine (1) + [bmim][Tf2N] (2) – solid-liquid equilibrium data, solid-liquid metastable data

|  |  |  |  | **equation 1** | | |  |  | **equation 2** | | |  |
| --- | --- | --- | --- | --- | --- | --- | --- | --- | --- | --- | --- | --- |
| ***x*1** | ***T*fus [K]** | ***T*metastable [K]** | γ2  (eq.1) | 103 σ(ln γ)  (eq.4) | σx  (eq. 5) | 102 σT  (eq. 5) | σH  (eq. 5) | γ2  (eq.2) | 103 σ(ln γ) (eq.4) | σx  (eq. 5) | 102 σT  (eq. 5) | σH  (eq. 5) |
| 1.0000 | 224.73 |  |  |  |  |  |  |  |  |  |  |  |
| 0.9882 | 225.27 |  |  |  |  |  |  |  |  |  |  |  |
| 0.9849 | 225.55 |  |  |  |  |  |  |  |  |  |  |  |
| 0.9788 | 225.57 |  |  |  |  |  |  |  |  |  |  |  |
| 0.9562 | 225.44 |  |  |  |  |  |  |  |  |  |  |  |
| 0.9354 | 225.55 |  |  |  |  |  |  |  |  |  |  |  |
| 0.9103 | 225.70 |  |  |  |  |  |  |  |  |  |  |  |
| 0.9027 | 225.50 |  |  |  |  |  |  |  |  |  |  |  |
| 0.8746 | 225.40 |  |  |  |  |  |  |  |  |  |  |  |
| 0.8262 | 226.01 |  | 0,86 | 8.02 | -5.75 | 4.38 | -8.99·10-5 | 0,68 | 9.58 | -5.75 | 5.60 | -8.99·10-5 |
| 0.7378 | 238.83 |  | 0,99 | 7.11 | -3.81 | 4.27 | -6.14·10-5 | 0,87 | 8.14 | -3.81 | 5.01 | -6.14·10-5 |
| 0.6511 | 246.32 |  | 1,02 | 6.70 | -2.87 | 4.19 | -4.60·10-5 | 0,96 | 7.45 | -2.87 | 4.71 | -4.60·10-5 |
| 0.5972 | 250.20 |  | 1,04 | 6.52 | -2.48 | 4.14 | -3.85·10-5 | 0,99 | 7.13 | -2.48 | 4.57 | -3.85·10-5 |
| 0.5062 | 254.70 |  | 1,02 | 6.33 | -2.03 | 4.09 | -3.00·10-5 | 0,99 | 6.80 | -2.03 | 4.41 | -3.00·10-5 |
| 0.4914 | 255.16 | 201.91 | 1,01 | 6.31 | -1.97 | 4.09 | -2.91·10-5 | 0,98 | 6.76 | -1.97 | 4.39 | -2.91·10-5 |
| 0.4341 | 257.42 | 206.13 | 0,99 | 6.23 | -1.77 | 4.06 | -2.50·10-5 | 0,98 | 6.61 | -1.77 | 4.32 | -2.50·10-5 |
| 0.3857 | 259.68 | 211.34 | 1,00 | 6.15 | -1.63 | 4.03 | -2.09·10-5 | 0,99 | 6.47 | -1.63 | 4.24 | -2.09·10-5 |
| 0.3238 | 261.69 | 215.63 | 0,99 | 6.09 | -1.48 | 4.00 | -1.74·10-5 | 0,98 | 6.35 | -1.48 | 4.18 | -1.74·10-5 |
| 0.2453 | 264.43 | 221.19 | 0,99 | 6.01 | -1.33 | 3.97 | -1.26·10-5 | 0,98 | 6.19 | -1.33 | 4.09 | -1.26·10-5 |
| 0.1642 | 267.70 | 224.61 | 1,01 | 5.92 | -1.20 | 3.92 | -7.04·10-6 | 1,01 | 6.02 | -1.20 | 3.99 | -7.04·10-6 |
| 0.0953 | 269.11 |  | 0,99 | 5.89 | -1.11 | 3.91 | -4.68·10-6 | 0,99 | 5.95 | -1.11 | 3.95 | -4.68·10-6 |
| 0.0000 | 271.96 | 231.85 | 1,00 | 5.82 | -1.00 | 3.87 | 0.00 | 1,00 | 5.82 | -1.00 | 3.87 | 0.00 |

**Table 4-SI**: System diethylamine (1) + [emim][Tf2N] (2) – cloud-point liquid-liquid equilibrium data

| **[emim][Tf2N] rich phase** | | **diethalyamine riche phase** | |
| --- | --- | --- | --- |
| ***x*1** | ***T* [K]** | ***x*1** | ***T* [K]** |
| 0.6493 | 270.13 | 0.9891 | 270.96 |
| 0.6637 | 265.27 | 0.9894 | 258.15 |
| 0.6757 | 256.09 | 0.9908 | 253.16 |
| 0.6759 | 260.19 | 0.9918 | 235.89 |
| 0.6883 | 253.81 | 0.9925 | 265.95 |
| 0.6885 | 250.41 | 0.9943 | 243.67 |
| 0.7024 | 243.78 |  |  |
| 0.7202 | 235.59 |  |  |


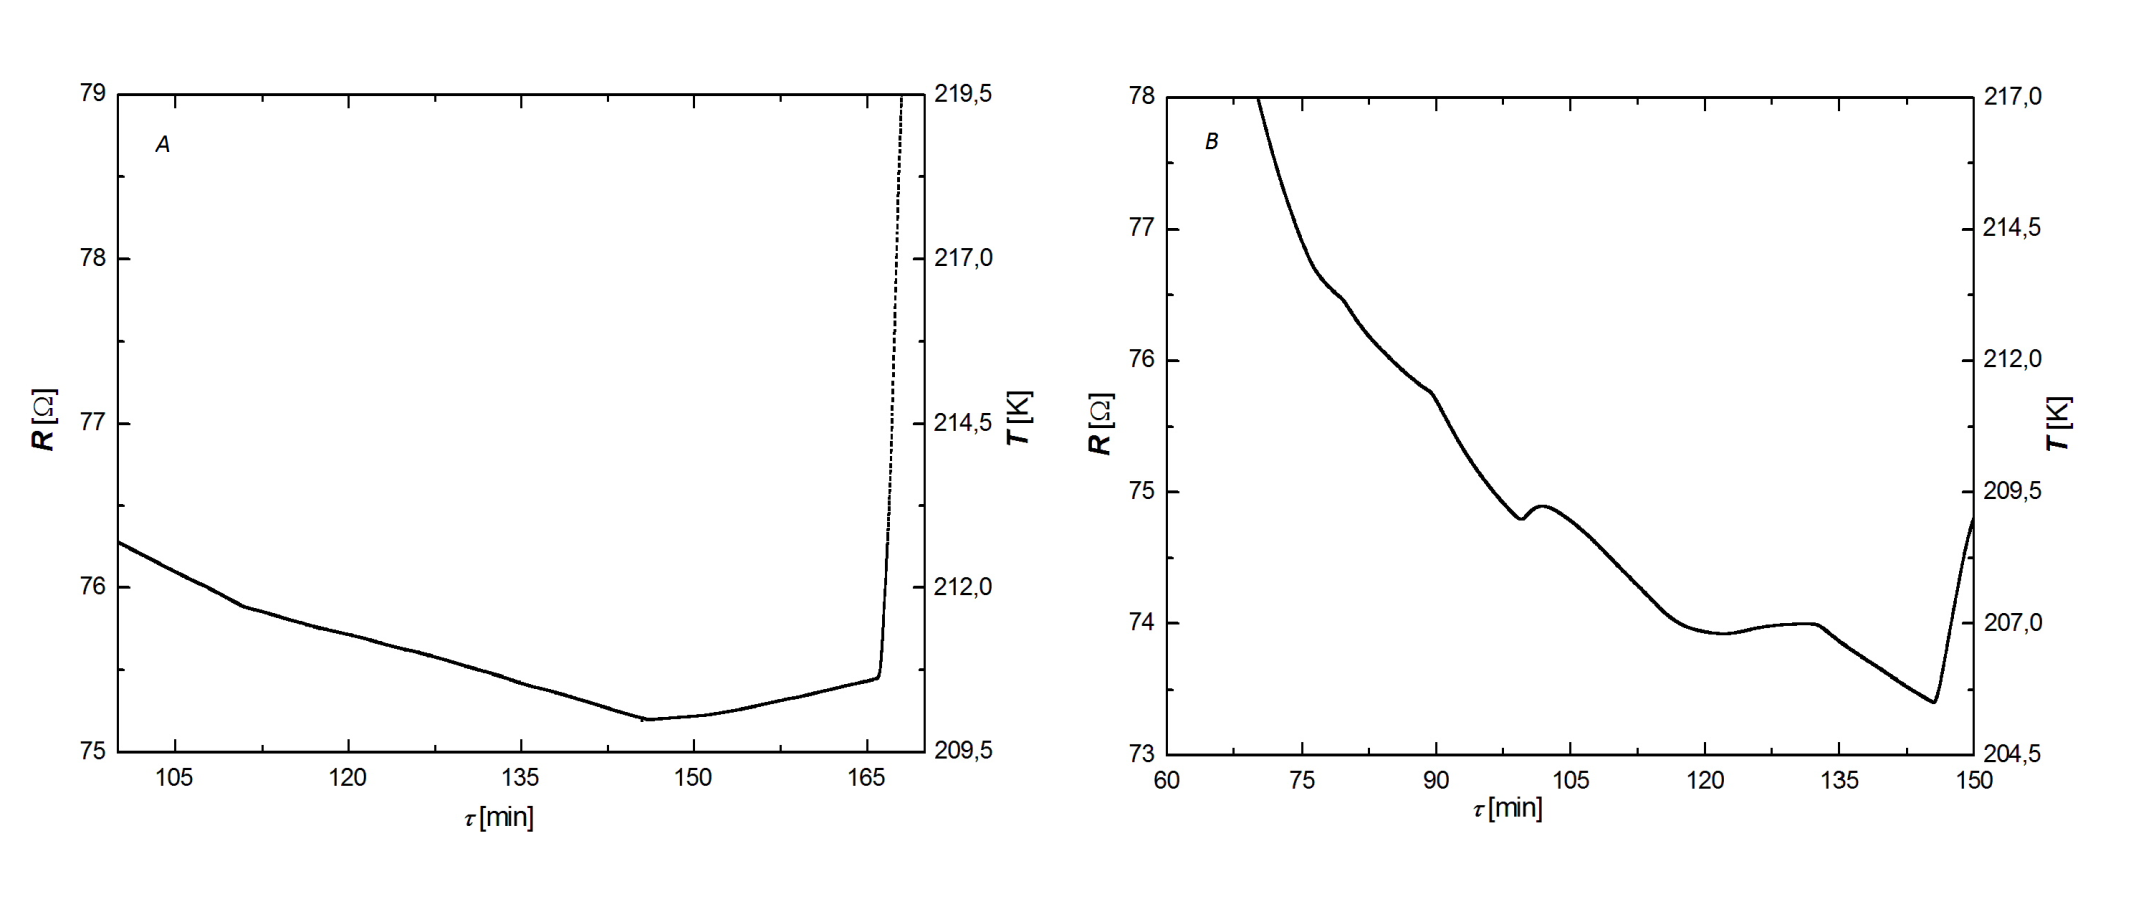


**Fig. 1-SI**: Cooling curves in the system diethylamine + [bmim][Tf2N]: *A* abrupt change in the slope of cooling curve; *B* nonmonotonous course of the cooling curve.


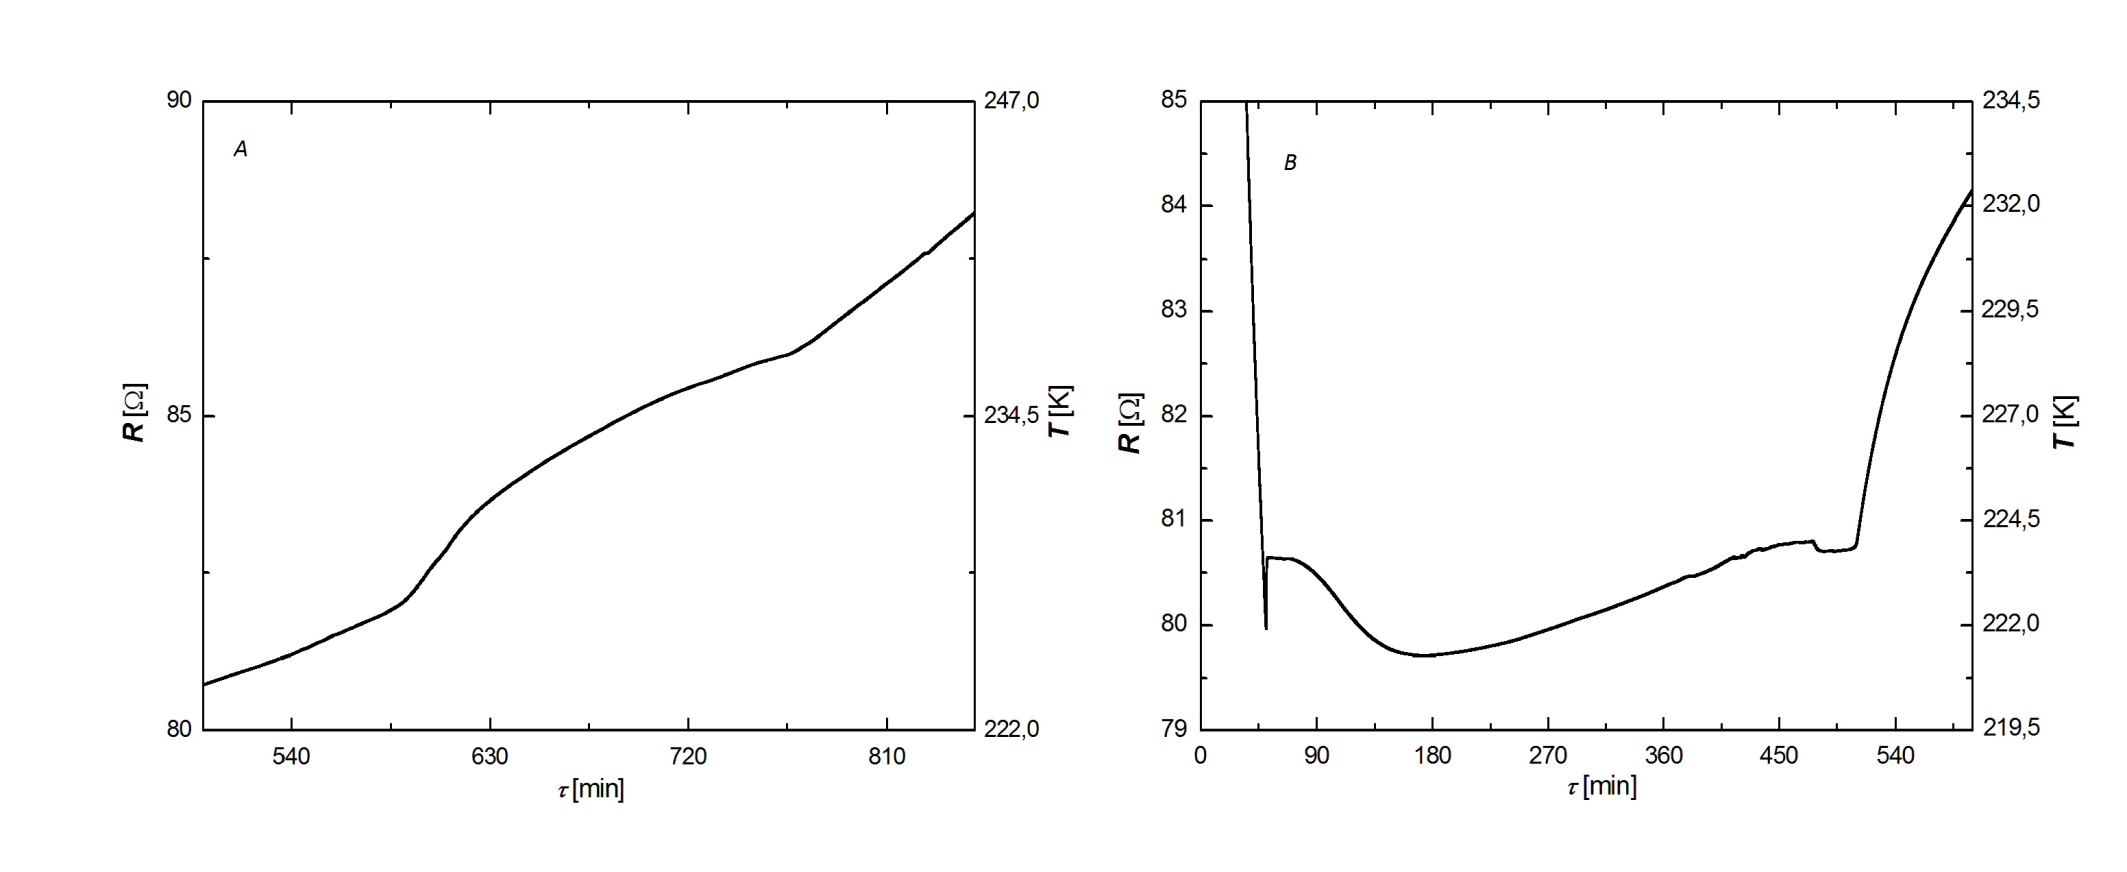


**Fig. 2-SI**: Heating curves in the system diethylamine + [bmim][Tf2N]: *A* anomalous course of heating curve with change of slope, temperatures under the equilibrious temperature of fusion; *B* wide minimum on heating curve before melting.
